# Supplementary material for: A Systematic Review of the Effects of Temperature on Anopheles Mosquito Development and Survival: Implications for Malaria Control in a Future Warmer Climate
Source: MDPI journal article supplement (doi:10.3390/ijerph18147255), 2021-07-07
Supplement: s1 [file s1]

## Supplementary information

**Table S1: Search terms and search results from databases**

| Database       | Search Term                                                                                                                                                                                                                     | Search Results |
|----------------|---------------------------------------------------------------------------------------------------------------------------------------------------------------------------------------------------------------------------------|----------------|
| Google Scholar | ("Anopheles mosquito") AND ("temperature" OR "season") AND ("longevity" OR "fecundity" OR "gonotrophic cycle" OR "development time" OR "enzyme" OR "insecticide")                                                               | <b>8130</b>    |
| Scopus         | TITLE-ABS-KEY ( "anopheles mosquito" OR "malaria" ) AND ( "temperature" OR season ) AND ( "development time" OR "survival" OR "longevity" OR "fecundity" OR "gonotrophic cycle" OR "biting rate" OR "enzyme" OR "insecticide" ) | <b>5926</b>    |
| Science Direct | ("Anopheles mosquito") AND ("temperature" OR "season") AND ("longevity" OR "fecundity" OR "gonotrophic cycle" OR "development time" OR "enzyme" OR "insecticide")                                                               | <b>1403</b>    |
| PubMed         | ("anopheles mosquito" OR "malaria" ) AND ( "temperature" OR season ) AND ( "development time" OR "survival" OR "longevity" OR "fecundity" OR "gonotrophic cycle" OR "biting rate" OR "enzyme" OR "insecticide")                 | <b>1156</b>    |
| ProQuest       | ("Anopheles mosquito") AND ("temperature" OR "season") AND ("longevity" OR "fecundity" OR "gonotrophic cycle" OR "development time" OR "enzyme" OR "insecticide")                                                               | <b>850</b>     |
| Web of Science | ("Anopheles mosquito") AND ("temperature" OR "season") AND ("longevity" OR "fecundity" OR "gonotrophic cycle" OR "development time" OR "enzyme" OR "insecticide")                                                               | <b>17</b>      |
| Hand search    |                                                                                                                                                                                                                                 | <b>4</b>       |

**Table S2: List of studies excluded with reasons**

| Sn | Author name                       | Reason for exclusion |
|----|-----------------------------------|----------------------|
| 1  | Abiodun et al. [1]                | 1                    |
| 2  | Abiodun et al. [2]                | 1                    |
| 3  | Abiodun et al. [3]                | 1                    |
| 4  | Agusto et al. [4]                 | 1                    |
| 5  | Beck-Johnson [5]                  | 1                    |
| 6  | Beck-Johnson et al. [6]           | 1                    |
| 7  | Beck-Johnson et al. [7]           | 1                    |
| 8  | Blanford et al. [8]               | 2                    |
| 9  | Charlwood and Braganca [9]        | 3                    |
| 10 | Christiansen-Jucht et al. [10]    | 1                    |
| 11 | Culler et al. [11]                | 1                    |
| 12 | Ewing et al. [12]                 | 1                    |
| 13 | Glunt et al. [13]                 | 2                    |
| 14 | Gonçalves De Carvalho et al. [14] | 3                    |
| 15 | Lindsay et al. [15]               | 4                    |
| 16 | Lunde et al. [16]                 | 1                    |
| 17 | Lyons et al. [17]                 | 1                    |
| 18 | Mordecai et al. [18]              | 2                    |
| 19 | Mukhtar et al. [19]               | 1                    |
| 20 | Murdock et al. [20]               | 2                    |
| 21 | Murdock et al. [21]               | 2                    |
| 22 | Okechukwu et al. [22]             | 4                    |
| 23 | Okuneye et al. [23]               | 1                    |
| 24 | Owiti and Christopher [24]        | 3                    |
| 25 | Owusu et al. [25]                 | 2                    |
| 26 | Paaijmans et al. [26]             | 3                    |
| 27 | Paaijmans et al. [27]             | 2                    |
| 28 | Paaijmans et al. [28]             | 1                    |
| 29 | Parham and Michael [29]           | 1                    |
| 30 | Parham and Michael [30]           | 1                    |
| 31 | Parham et al. [31]                | 1                    |
| 32 | Shimaponda-Mataa et al. [32]      | 1                    |
| 33 | Wang et al. [33]                  | 1                    |
| 34 | Wei-Ming et al. [34]              | 4                    |
| 35 | Yamana and Eltahir [35]           | 1                    |
| 36 | Zakharova et al. [36]             | 4                    |

1 = mathematical models; 2 = Opinions/Letters/Reports; 3 = Study did not report on any of the outcomes of interest; 4 = Full text not available

## References

1. Abiodun, G.J., Maharaj, R., Witbooi, P., and Okosun, K.O., *Modelling the influence of temperature and rainfall on the population dynamics of Anopheles arabiensis*. Malaria Journal, 2016. **15**(1): p. 364.
2. Abiodun, G.J., Witbooi, P., and Okosun, K.O., *Modeling and analyzing the impact of temperature and rainfall on mosquito population dynamics over Kwazulu-Natal, South Africa*. International Journal of Biomathematics, 2017. **10**(4).
3. Abiodun, G.J., Witbooi, P., and Okosun, K.O., *Modelling the impact of climatic variables on malaria transmission*. Hacettepe Journal of Mathematics and Statistics, 2018. **47**(2): p. 219-235.

4. Agosto, F., Gumel, A., and Parham, P., *Qualitative assessment of the role of temperature variations on malaria transmission dynamics*. Journal of Biological Systems, 2015. **23**(04): p. 1550030.
5. Beck-Johnson, L.M., *Temperature impacts on mosquito population dynamics and malaria transmission*. 2013.
6. Beck-Johnson, L.M., Nelson, W.A., Paaijmans, K.P., Read, A.F., Thomas, M.B., and Bjørnstad, O.N., *The effect of temperature on Anopheles mosquito population dynamics and the potential for malaria transmission*. PLOS ONE, 2013. **8**(11): p. e79276.
7. Beck-Johnson, L.M., Nelson, W.A., Paaijmans, K.P., Read, A., Thomas, M.B., and Bjørnstad, O.N., *The importance of temperature fluctuations in understanding mosquito population dynamics and malaria risk*. Royal Society Open Science, 2017. **4**(3).
8. Blanford, J.I., Blanford, S., Crane, R.G., Mann, M.E., Paaijmans, K.P., Schreiber, K.V., et al., *Implications of temperature variation for malaria parasite development across Africa*. Scientific reports, 2013. **3**(1): p. 1-11.
9. Charlwood, J.D. and Braganca, M., *The effect of rainstorms on adult Anopheles funestus behavior and survival*. Journal of Vector Ecology, 2012. **37**(1): p. 252-256.
10. Christiansen-Jucht, C., Erguler, K., Shek, C.Y., Basanez, M.-G., and Parham, P.E., *Modelling Anopheles gambiae ss population dynamics with temperature-and age-dependent survival*. International journal of environmental research public health, 2015b. **12**(6): p. 5975-6005.
11. Culler, L.E., Ayres, M.P., and Virginia, R.A., *In a warmer Arctic, mosquitoes avoid increased mortality from predators by growing faster*. Proceedings of the Royal Society B: Biological Sciences, 2015. **282**(1815): p. 20151549.
12. Ewing, D.A., Cobbold, C.A., Purse, B., Nunn, M., and White, S.M., *Modelling the effect of temperature on the seasonal population dynamics of temperate mosquitoes*. Journal of theoretical biology, 2016. **400**: p. 65-79.
13. Glunt, K.D., Blanford, J.I., and Paaijmans, K.P., *Chemicals, climate, and control: increasing the effectiveness of malaria vector control tools by considering relevant temperatures*. PLoS Pathogens, 2013. **9**(10): p. e1003602.
14. Gonçalves De Carvalho, S.C., De Jesus Martins Jr, A., Pereira Lima, J.B., and Valle, D., *Temperature influence on embryonic development of Anopheles albiparvus and Anopheles aquasalis*. Memórias do Instituto Oswaldo Cruz, 2002. **97**(8): p. 1117-1120.
15. Lindsay, S.W., Wilkins, H.A., Zieler, H.A., Daly, R.J., Petrarca, V., and Byass, P., *Ability of Anopheles gambiae mosquitoes to transmit malaria during the dry and wet seasons in an area of irrigated rice cultivation in The Gambia*. Journal of Tropical Medicine and Hygiene, 1991. **94**(5): p. 313-324.
16. Lunde, T.M., Bayoh, M.N., and Lindtjørn, B., *How malaria models relate temperature to malaria transmission*. Parasites and Vectors, 2013. **6**(1): p. 1-10.
17. Lyons, C.L., Coetzee, M., Terblanche, J.S., and Chown, S.L., *Desiccation tolerance as a function of age, sex, humidity and temperature in adults of the African malaria vectors Anopheles arabiensis and Anopheles funestus*. Journal of Experimental Biology, 2014. **217**(21): p. 3823-3833.
18. Mordecai, E.A., Paaijmans, K.P., Johnson, L.R., Balzer, C., Ben-Horin, T., de Moor, E., et al., *Optimal temperature for malaria transmission is dramatically lower than previously predicted*. Ecology letters, 2013. **16**(1): p. 22-30.
19. Mukhtar, A.Y.A., Munyakazi, J.B., and Ouifki, R., *Assessing the role of climate factors on malaria transmission dynamics in South Sudan*. Mathematical Biosciences, 2019. **310**: p. 13-23.
20. Murdock, C., Sternberg, E., and Thomas, M., *Malaria transmission potential could be reduced with current and future climate change*. Scientific reports, 2016. **6**(1): p. 1-7.
21. Murdock, C.C., Paaijmans, K.P., Cox-Foster, D., Read, A.F., and Thomas, M.B., *Rethinking vector immunology: the role of environmental temperature in shaping resistance*. Nature Reviews Microbiology, 2012. **10**(12): p. 869.
22. Okechukwu, R., Okereke, J., Ezejiofor, T., Obasi, K., and Ebere, G., *Relationship between malaria vector densities in artificial container habitats, land-use changes and temperature*. Nigerian Journal of Parasitology, 2011. **32**(2).

23. Okuneye, K., Eikenberry, S.E., and Gumel, A.B., *Weather-driven malaria transmission model with gonotrophic and sporogonic cycles*. Journal of biological dynamics, 2019. **13**(sup1): p. 288-324.
24. Owti, Y.J. and Christopher, M.J.J.J.o.B.S., *Effect of Temperature and pH on Egg Viability and Pupation of Anopheles arabiensis Patton (Diptera: Culicidae): Prospect for Optimizing Colony Reproduction Procedures*. 2017. **10**(1).
25. Owusu, H.F., Chitnis, N., and Müller, P., *Insecticide susceptibility of Anopheles mosquitoes changes in response to variations in the larval environment*. Scientific reports, 2017. **7**(1): p. 1-9.
26. Paaijmans, K.P., Blanford, S., Chan, B.H.K., and Thomas, M.B., *Warmer temperatures reduce the vectorial capacity of malaria mosquitoes*. Biology Letters, 2012. **8**(3): p. 465-468.
27. Paaijmans, K.P., Imbahale, S.S., Thomas, M.B., and Takken, W., *Relevant microclimate for determining the development rate of malaria mosquitoes and possible implications of climate change*. Malaria Journal, 2010. **9**(1).
28. Paaijmans, K.P., Read, A.F., and Thomas, M.B., *Understanding the link between malaria risk and climate*. Proceedings of the National Academy of Sciences of the United States of America, 2009. **106**(33): p. 13844-13849.
29. Parham, P.E. and Michael, E., *Modelling climate change and malaria transmission*, in *Advances in Experimental Medicine and Biology*. 2010a. p. 184-199.
30. Parham, P.E. and Michael, E., *Modeling the effects of weather and climate change on malaria transmission*. Environmental health perspectives, 2010b. **118**(5): p. 620-626.
31. Parham, P.E., Pople, D., Christiansen-Jucht, C., Lindsay, S., Hinsley, W., and Michael, E., *Modeling the role of environmental variables on the population dynamics of the malaria vector Anopheles gambiae sensu stricto*. Malaria Journal, 2012. **11**.
32. Shimaponda-Mataa, N.M., Tembo-Mwase, E., Gebreslasie, M., Achia, T.N., and Mukaratirwa, S., *Modelling the influence of temperature and rainfall on malaria incidence in four endemic provinces of Zambia using semiparametric Poisson regression*. Acta tropica, 2017. **166**: p. 81-91.
33. Wang, X., Tang, S., and Cheke, R.A., *A stage structured mosquito model incorporating effects of precipitation and daily temperature fluctuations*. Journal of theoretical biology, 2016. **411**: p. 27-36.
34. Wei-Ming, W., Hua-Yun, Z., Jun, C., Guo-Jing, Y., Ju-Lin, L., Ya-Ping, G., et al., *Impact of different temperatures on development of Anopheles anthropophagus in Jiangsu Province*. Zhongguo xue xi chong bing fang zhi za zhi = Chinese journal of schistosomiasis control, 2011. **23**(5): p. 571-574.
35. Yamana, T.K. and Eltahir, E.A., *Incorporating the effects of humidity in a mechanistic model of Anopheles gambiae mosquito population dynamics in the Sahel region of Africa*. Parasites and vectors, 2013. **6**(1): p. 1-10.
36. Zakharova, N.F., Losev, G.I., and Iakubovich, V., *The effect of density and temperature on the larval populations of the malaria vector Anopheles sacharovi*. Med Parazitol (Mosk), 1990(1): p. 3-7.
